# Supplementary material
Source: HighWire-hosted journal article supplement (http://www.qdcxjkg.com/highwire/filestream/114139/field_highwire_adjunct_files/0/ERJ-00974-2012_Disclosures.pdf)
Supplement: ERJ-00974-2012_Disclosures.pdf [file ERJ-00974-2012_Disclosures.pdf]

**M.J. Abramson** holds an investigator initiated research grant from Pfizer for unrelated work.
